# Supplementary material
Source: Springer Nature journal article supplement (https://www.springermedizin.de/resource/supplementary/10194_2012_280_MOESM4_ESM.pdf/9422594)

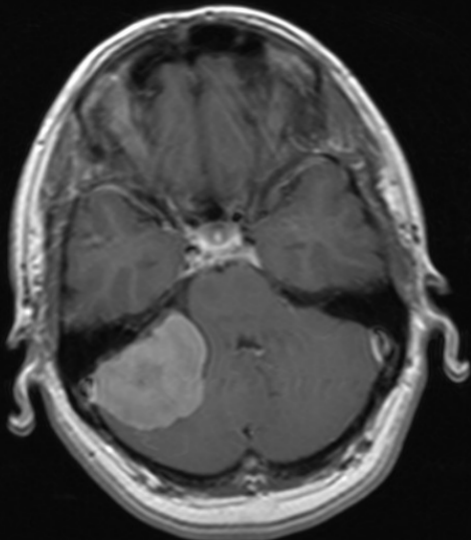

Supplement: MOESM4 [file 9422594]
